# Supplementary material for: Flavonoids and Devosia sp SL43 cell-free supernatant increase early plant growth under salt stress and optimal growth conditions
Source: PubMed Central journal article supplement (PMC9690568; doi:10.3389/fpls.2022.1030985), 2022-11-10
Supplement: DataSheet_1.pdf [file DataSheet_1.pdf]

## Supplementary Tables

**Table 1:** Soybean growth responses to the foliar spray of flavonoids under salt stress (120 mM NaCl) and optimal growth condition

| <b>Soybean growth variables (foliar spray of flavonoids) – optimal conditions</b> |                            |                           |                                   |                           |                             |                                |                                     |
|-----------------------------------------------------------------------------------|----------------------------|---------------------------|-----------------------------------|---------------------------|-----------------------------|--------------------------------|-------------------------------------|
| <b>Treatments</b>                                                                 | Shoot FW (g) ± SE          | Shoot DW (g) ± SE         | Leaf area (cm <sup>2</sup> ) ± SE | Root FW (g) ± SE          | Root DW (g) ± SE            | Root length (cm) ± SE          | Root volume (cm <sup>3</sup> ) ± SE |
| <b><i>p</i>-value</b>                                                             | .0030                      | .0090                     | .0575                             | .1435                     | .0256                       | .1821                          | .0381                               |
| Ctrl                                                                              | 9.09 <sup>b</sup> ± 1.70   | 1.59 <sup>b</sup> ± 0.35  | 255.60 <sup>b</sup> ± 54.73       | 3.35 <sup>b</sup> ± 0.70  | 0.188 <sup>b</sup> ± 0.052  | 1407.25 <sup>b</sup> ± 213.82  | 2.523 <sup>b</sup> ± 0.581          |
| Fl 50 mL ha <sup>-1</sup>                                                         | 13.15 <sup>ab</sup> ± 1.99 | 2.40 <sup>ab</sup> ± 0.40 | 342.00 <sup>ab</sup> ± 59.95      | 5.09 <sup>ab</sup> ± 1.40 | 0.285 <sup>ab</sup> ± 0.060 | 1929.50 <sup>ab</sup> ± 280.17 | 3.992 <sup>ab</sup> ± 0.677         |
| Fl 100 mL ha <sup>-1</sup>                                                        | 16.83 <sup>a</sup> ± 1.60  | 2.96 <sup>a</sup> ± 0.30  | 429.43 <sup>a</sup> ± 48.32       | 6.35 <sup>a</sup> ± 1.21  | 0.393 <sup>a</sup> ± 0.053  | 1975.25 <sup>a</sup> ± 272.08  | 4.569 <sup>a</sup> ± 0.689          |
| Fl 150 mL ha <sup>-1</sup>                                                        | 17.35 <sup>a</sup> ± 0.75  | 3.17 <sup>a</sup> ± 0.24  | 443.77 <sup>a</sup> ± 43.54       | 6.02 <sup>ab</sup> ± 0.81 | 0.390 <sup>a</sup> ± 0.035  | 2062.25 <sup>a</sup> ± 59.11   | 4.969 <sup>a</sup> ± 0.399          |

  

| <b>Soybean growth variables (foliar spray of flavonoids) – 120 mM NaCl condition</b> |                          |                          |                                   |                          |                            |                               |                                     |
|--------------------------------------------------------------------------------------|--------------------------|--------------------------|-----------------------------------|--------------------------|----------------------------|-------------------------------|-------------------------------------|
| <b>Treatments</b>                                                                    | Shoot FW (g) ± SE        | Shoot DW (g) ± SE        | Leaf area (cm <sup>2</sup> ) ± SE | Root FW (g) ± SE         | Root DW (g) ± SE           | Root length (cm) ± SE         | Root volume (cm <sup>3</sup> ) ± SE |
| <b><i>p</i>-value</b>                                                                | .3292                    | .3346                    | .0895                             | .6209                    | .2421                      | .0968                         | .4101                               |
| Ctrl                                                                                 | 3.60 <sup>a</sup> ± 0.85 | 0.59 <sup>a</sup> ± 0.17 | 89.25 <sup>ab</sup> ± 26.27       | 1.34 <sup>a</sup> ± 0.29 | 0.050 <sup>a</sup> ± 0.015 | 496.38 <sup>b</sup> ± 129.42  | 0.914 <sup>a</sup> ± 0.229          |
| Fl 50 mL ha <sup>-1</sup>                                                            | 5.15 <sup>a</sup> ± 0.53 | 0.86 <sup>a</sup> ± 0.09 | 140.92 <sup>a</sup> ± 18.26       | 1.99 <sup>a</sup> ± 0.29 | 0.083 <sup>a</sup> ± 0.010 | 881.38 <sup>a</sup> ± 62.81   | 1.275 <sup>a</sup> ± 0.107          |
| Fl 100 mL ha <sup>-1</sup>                                                           | 3.70 <sup>a</sup> ± 0.62 | 0.60 <sup>a</sup> ± 0.11 | 76.98 <sup>b</sup> ± 14.21        | 1.62 <sup>a</sup> ± 0.36 | 0.054 <sup>a</sup> ± 0.011 | 600.63 <sup>ab</sup> ± 101.14 | 0.950 <sup>a</sup> ± 0.148          |
| Fl 150 mL ha <sup>-1</sup>                                                           | 4.50 <sup>a</sup> ± 0.62 | 0.75 <sup>a</sup> ± 0.09 | 94.81 <sup>ab</sup> ± 9.01        | 1.69 <sup>a</sup> ± 0.41 | 0.068 <sup>a</sup> ± 0.013 | 670.38 <sup>ab</sup> ± 121.21 | 1.173 <sup>a</sup> ± 0.189          |

**Table 2:** Soybean growth responses to the foliar spray of CFS under salt stress (120mM NaCl) and optimal growth condition

| <b>Soybean growth variables (foliar spray of CFS) – optimal conditions</b>    |                           |                          |                                   |                          |                           |                               |                                     |
|-------------------------------------------------------------------------------|---------------------------|--------------------------|-----------------------------------|--------------------------|---------------------------|-------------------------------|-------------------------------------|
| <b>Treatments</b>                                                             | Shoot FW (g) ± SE         | Shoot DW (g) ± SE        | Leaf area (cm <sup>2</sup> ) ± SE | Root FW (g) ± SE         | Root DW (g) ± SE          | Root length (cm) ± SE         | Root volume (cm <sup>3</sup> ) ± SE |
| <b>p-value</b>                                                                | 0.7968                    | 0.9998                   | 0.6069                            | 0.5506                   | 0.4781                    | 0.1657                        | 0.7633                              |
| Ctrl                                                                          | 13.96 <sup>a</sup> ± 1.99 | 2.94 <sup>a</sup> ± 0.37 | 444.04 <sup>a</sup> ± 54.67       | 5.27 <sup>a</sup> ± 1.00 | 0.47 <sup>a</sup> ± 0.06  | 2312.88 <sup>a</sup> ± 166.94 | 6.71 <sup>a</sup> ± 1.09            |
| Fl 50 mL ha <sup>-1</sup>                                                     | 13.95 <sup>a</sup> ± 1.30 | 2.94 <sup>a</sup> ± 0.24 | 458.41 <sup>a</sup> ± 35.76       | 5.53 <sup>a</sup> ± 0.62 | 0.46 <sup>a</sup> ± 0.04  | 2784.50 <sup>a</sup> ± 215.08 | 6.40 <sup>a</sup> ± 0.59            |
| Fl 100 mL ha <sup>-1</sup>                                                    | 14.90 <sup>a</sup> ± 1.45 | 2.96 <sup>a</sup> ± 0.31 | 477.37 <sup>a</sup> ± 38.40       | 6.11 <sup>a</sup> ± 0.85 | 0.54 <sup>a</sup> ± 0.05  | 2730.25 <sup>a</sup> ± 172.40 | 7.38 <sup>a</sup> ± 0.80            |
| Fl 150 mL ha <sup>-1</sup>                                                    | 15.83 <sup>a</sup> ± 1.30 | 2.98 <sup>a</sup> ± 0.48 | 521.56 <sup>a</sup> ± 39.58       | 6.92 <sup>a</sup> ± 0.93 | 0.55 <sup>a</sup> ± 0.05  | 2783.00 <sup>a</sup> ± 100.30 | 7.44 <sup>a</sup> ± 0.72            |
| <b>Soybean growth variables (foliar spray of CFS) – 120 mM NaCl condition</b> |                           |                          |                                   |                          |                           |                               |                                     |
| <b>Treatments</b>                                                             | Shoot FW (g) ± SE         | Shoot DW (g) ± SE        | Leaf area (cm <sup>2</sup> ) ± SE | Root FW (g) ± SE         | Root DW (g) ± SE          | Root length (cm) ± SE         | Root volume (cm <sup>3</sup> ) ± SE |
| <b>p-value</b>                                                                | 0.0379                    | 0.0007                   | 0.0132                            | 0.2386                   | 0.1160                    | 0.2547                        | 0.1345                              |
| Ctrl                                                                          | 2.89 <sup>b</sup> ± 0.86  | 0.54 <sup>b</sup> ± 0.15 | 73.24 <sup>b</sup> ± 31.81        | 1.05 <sup>a</sup> ± 0.36 | 0.06 <sup>b</sup> ± 0.02  | 689.25 <sup>a</sup> ± 210.07  | 1.16 <sup>b</sup> ± 0.44            |
| Fl 50 mL ha <sup>-1</sup>                                                     | 3.95 <sup>ab</sup> ± 0.55 | 0.65 <sup>b</sup> ± 0.10 | 90.53 <sup>b</sup> ± 17.77        | 1.16 <sup>a</sup> ± 0.22 | 0.08 <sup>ab</sup> ± 0.02 | 848.75 <sup>a</sup> ± 172.97  | 1.36 <sup>ab</sup> ± 0.30           |
| Fl 100 mL ha <sup>-1</sup>                                                    | 6.58 <sup>a</sup> ± 1.43  | 1.41 <sup>a</sup> ± 0.21 | 215.38 <sup>a</sup> ± 49.24       | 2.04 <sup>a</sup> ± 0.57 | 0.15 <sup>a</sup> ± 0.04  | 1309.50 <sup>a</sup> ± 277.79 | 2.52 <sup>a</sup> ± 0.64            |
| Fl 150 mL ha <sup>-1</sup>                                                    | 3.38 <sup>b</sup> ± 0.52  | 0.67 <sup>b</sup> ± 0.09 | 91.82 <sup>b</sup> ± 16.68        | 1.25 <sup>a</sup> ± 0.21 | 0.08 <sup>ab</sup> ± 0.02 | 968.88 <sup>a</sup> ± 205.87  | 1.35 <sup>ab</sup> ± 0.26           |

**Table 3:** Canola growth responses to the foliar spray of **flavonoids** under salt stress (150 mM NaCl) and optimal growth condition

| <b>Canola growth variables (foliar spray of Flavonoids) – optimal conditions</b>   |                           |                          |                                   |                           |                          |                                |                                     |
|------------------------------------------------------------------------------------|---------------------------|--------------------------|-----------------------------------|---------------------------|--------------------------|--------------------------------|-------------------------------------|
| <b>Treatments</b>                                                                  | Shoot FW (g) ± SE         | Shoot DW (g) ± SE        | Leaf area (cm <sup>2</sup> ) ± SE | Root FW (g) ± SE          | Root DW (g) ± SE         | Root length (cm) ± SE          | Root volume (cm <sup>3</sup> ) ± SE |
| <b><i>p</i>-value</b>                                                              | 0.7808                    | 0.7996                   | 0.6978                            | 0.7387                    | 0.5684                   | 0.0548*                        | 0.2196                              |
| Ctrl                                                                               | 30.15 <sup>a</sup> ± 3.87 | 2.98 <sup>a</sup> ± 0.48 | 508.41 <sup>a</sup> ± 63.15       | 2.74 <sup>a</sup> ± 0.20  | 0.29 <sup>a</sup> ± 0.02 | 1677.75 <sup>b</sup> ± 161.25  | 3.27 <sup>a</sup> ± 0.32            |
| Fl 100 mL ha <sup>-1</sup>                                                         | 32.24 <sup>a</sup> ± 3.93 | 3.19 <sup>a</sup> ± 0.50 | 579.55 <sup>a</sup> ± 70.97       | 3.27 <sup>a</sup> ± 0.37  | 0.33 <sup>a</sup> ± 0.03 | 1970.38 <sup>ab</sup> ± 125.84 | 3.73 <sup>a</sup> ± 0.36            |
| Fl 200 mL ha <sup>-1</sup>                                                         | 27.25 <sup>a</sup> ± 3.45 | 2.63 <sup>a</sup> ± 0.40 | 477.92 <sup>a</sup> ± 59.61       | 3.00 <sup>a</sup> ± 0.38  | 0.28 <sup>a</sup> ± 0.04 | 1645.75 <sup>b</sup> ± 86.34   | 3.57 <sup>a</sup> ± 0.45            |
| Fl 300 mL ha <sup>-1</sup>                                                         | 31.86 <sup>a</sup> ± 3.84 | 3.19 <sup>a</sup> ± 0.45 | 559.50 <sup>a</sup> ± 73.55       | 3.06 <sup>a</sup> ± 0.38  | 0.28 <sup>a</sup> ± 0.02 | 2325.25 <sup>a</sup> ± 300.80  | 2.73 <sup>a</sup> ± 0.27            |
| <b>Canola growth variables (foliar spray of Flavonoids) – 150mM NaCl condition</b> |                           |                          |                                   |                           |                          |                                |                                     |
| <b>Treatments</b>                                                                  | Shoot FW (g) ± SE         | Shoot DW (g) ± SE        | Leaf area (cm <sup>2</sup> ) ± SE | Root FW (g) ± SE          | Root DW (g) ± SE         | Root length (cm) ± SE          | Root volume (cm <sup>3</sup> ) ± SE |
| <b><i>p</i>-value</b>                                                              | 0.6435                    | 0.6341                   | 0.5886                            | 0.1032                    | 0.2294                   | 0.1344                         | 0.1345                              |
| Ctrl                                                                               | 23.43 <sup>a</sup> ± 3.30 | 1.95 <sup>a</sup> ± 0.34 | 387.09 <sup>a</sup> ± 52.71       | 1.69 <sup>b</sup> ± 0.27  | 0.15 <sup>a</sup> ± 0.02 | 1449.63 <sup>b</sup> ± 152.07  | 1.16 <sup>b</sup> ± 0.44            |
| Fl 100 mL ha <sup>-1</sup>                                                         | 29.33 <sup>a</sup> ± 3.18 | 2.50 <sup>a</sup> ± 0.34 | 487.04 <sup>a</sup> ± 55.51       | 2.76 <sup>a</sup> ± 0.40  | 0.22 <sup>a</sup> ± 0.03 | 2162.75 <sup>a</sup> ± 206.09  | 1.36 <sup>ab</sup> ± 0.30           |
| Fl 200 mL ha <sup>-1</sup>                                                         | 25.10 <sup>a</sup> ± 2.12 | 2.05 <sup>a</sup> ± 0.21 | 424.23 <sup>a</sup> ± 34.26       | 2.12 <sup>ab</sup> ± 0.24 | 0.16 <sup>a</sup> ± 0.02 | 1884.63 <sup>ab</sup> ± 186.39 | 2.52 <sup>a</sup> ± 0.64            |
| Fl 300 mL ha <sup>-1</sup>                                                         | 25.12 <sup>a</sup> ± 4.42 | 2.05 <sup>a</sup> ± 0.39 | 401.53 <sup>a</sup> ± 70.08       | 1.74 <sup>b</sup> ± 0.38  | 0.15 <sup>a</sup> ± 0.03 | 1601.50 <sup>ab</sup> ± 311.28 | 1.35 <sup>ab</sup> ± 0.26           |

**Table 4:** Canola growth responses to the foliar spray of CFS under salt stress (150 mM NaCl) and optimal growth condition

| <b>Canola growth variables (foliar spray of CFS) – optimal conditions</b>   |                           |                          |                                   |                          |                          |                               |                                     |
|-----------------------------------------------------------------------------|---------------------------|--------------------------|-----------------------------------|--------------------------|--------------------------|-------------------------------|-------------------------------------|
| <b>Treatments</b>                                                           | Shoot FW (g) ± SE         | Shoot DW (g) ± SE        | Leaf area (cm <sup>2</sup> ) ± SE | Root FW (g) ± SE         | Root DW (g) ± SE         | Root length (cm) ± SE         | Root volume (cm <sup>3</sup> ) ± SE |
| <b><i>p</i>-value</b>                                                       | 0.9201                    | 0.5508                   | 0.9675                            | 0.7486                   | 0.5901                   | 0.7025                        | 0.7024                              |
| Ctrl                                                                        | 23.68 <sup>a</sup> ± 5.20 | 2.18 <sup>a</sup> ± 0.38 | 413.00 <sup>a</sup> ± 82.09       | 2.23 <sup>a</sup> ± 0.26 | 0.31 <sup>a</sup> ± 0.05 | 1918.13 <sup>a</sup> ± 166.14 | 3.07 <sup>a</sup> ± 0.17            |
| Fl 100 mL ha <sup>-1</sup>                                                  | 26.08 <sup>a</sup> ± 4.70 | 2.55 <sup>a</sup> ± 0.31 | 432.25 <sup>a</sup> ± 75.19       | 2.09 <sup>a</sup> ± 0.18 | 0.34 <sup>a</sup> ± 0.03 | 1943.83 <sup>a</sup> ± 146.04 | 3.05 <sup>a</sup> ± 0.21            |
| Fl 200 mL ha <sup>-1</sup>                                                  | 24.26 <sup>a</sup> ± 4.99 | 2.24 <sup>a</sup> ± 0.30 | 431.74 <sup>a</sup> ± 85.86       | 2.21 <sup>a</sup> ± 0.23 | 0.34 <sup>a</sup> ± 0.04 | 1841.60 <sup>a</sup> ± 98.35  | 3.08 <sup>a</sup> ± 0.21            |
| Fl 300 mL ha <sup>-1</sup>                                                  | 27.98 <sup>a</sup> ± 4.28 | 2.72 <sup>a</sup> ± 0.21 | 468.61 <sup>a</sup> ± 74.96       | 2.43 <sup>a</sup> ± 0.21 | 0.39 <sup>a</sup> ± 0.04 | 2101.30 <sup>a</sup> ± 204.16 | 3.38 <sup>a</sup> ± 0.29            |
| <b>Canola growth variables (foliar spray of CFS) – 150mM NaCl condition</b> |                           |                          |                                   |                          |                          |                               |                                     |
| <b>Treatments</b>                                                           | Shoot FW (g) ± SE         | Shoot DW (g) ± SE        | Leaf area (cm <sup>2</sup> ) ± SE | Root FW (g) ± SE         | Root DW (g) ± SE         | Root length (cm) ± SE         | Root volume (cm <sup>3</sup> ) ± SE |
| <b><i>p</i>-value</b>                                                       | 0.9678                    | 0.8980                   | 0.9491                            | 0.8803                   | 0.6190                   | 0.5760                        | 0.1636                              |
| Ctrl                                                                        | 23.08 <sup>a</sup> ± 4.96 | 2.10 <sup>a</sup> ± 0.41 | 403.92 <sup>a</sup> ± 73.88       | 1.98 <sup>a</sup> ± 0.23 | 0.30 <sup>a</sup> ± 0.04 | 1782.13 <sup>a</sup> ± 94.33  | 3.02 <sup>ab</sup> ± 0.25           |
| Fl 100 mL ha <sup>-1</sup>                                                  | 26.05 <sup>a</sup> ± 3.49 | 2.45 <sup>a</sup> ± 0.27 | 453.96 <sup>a</sup> ± 63.55       | 2.22 <sup>a</sup> ± 0.25 | 0.37 <sup>a</sup> ± 0.03 | 1722.63 <sup>a</sup> ± 141.95 | 3.43 <sup>ab</sup> ± 0.19           |
| Fl 200 mL ha <sup>-1</sup>                                                  | 25.34 <sup>a</sup> ± 4.04 | 2.31 <sup>a</sup> ± 0.29 | 457.40 <sup>a</sup> ± 71.27       | 2.25 <sup>a</sup> ± 0.19 | 0.35 <sup>a</sup> ± 0.03 | 2018.00 <sup>a</sup> ± 191.26 | 3.57 <sup>a</sup> ± 0.28            |
| Fl 300 mL ha <sup>-1</sup>                                                  | 25.01 <sup>a</sup> ± 4.82 | 2.14 <sup>a</sup> ± 0.46 | 443.97 <sup>a</sup> ± 77.54       | 2.14 <sup>a</sup> ± 0.35 | 0.31 <sup>a</sup> ± 0.05 | 1884.25 <sup>a</sup> ± 184.15 | 2.79 <sup>b</sup> ± 0.33            |
